# Supplementary material for: Representation of a two-way coupled irrigation system in the Common Land Model
Source: Copernicus journal article supplement (doi:10.5194/egusphere-2024-4093), 2025-01-22
Supplement: Supplementary file 1 [file egusphere-2024-4093-supplement-version2.pdf]

1  
2  
3  
4  
5  
6  
7  
8  
9  
10  
11

**Supplementary Information for**  
**Representation of a two-way coupled irrigation system in the**  
**Common Land Model**

Shulei Zhang<sup>1, #</sup>, Hongbin Liang<sup>1, #</sup>, Fang Li<sup>2</sup>, Xingjie Lu<sup>1</sup>, Yongjiu Dai<sup>1</sup>

<sup>1</sup> *Southern Marine Science and Engineering Guangdong Laboratory (Zhuhai), School of  
Atmospheric Sciences, Sun Yat-sen University, Guangzhou, China*

<sup>2</sup> *International Center for Climate and Environment Sciences, Institute of Atmospheric Physics,  
Chinese Academy of Sciences, Beijing, 100029, China*

*Corresponding Author: Shulei Zhang (zhangshlei@mail.sysu.edu.cn) & Hongbin Liang  
(lianghb25@mail2.sysu.edu.cn)*

<sup>#</sup> *These authors contributed equally to this work.*

12    **1. Supplementary Figures**

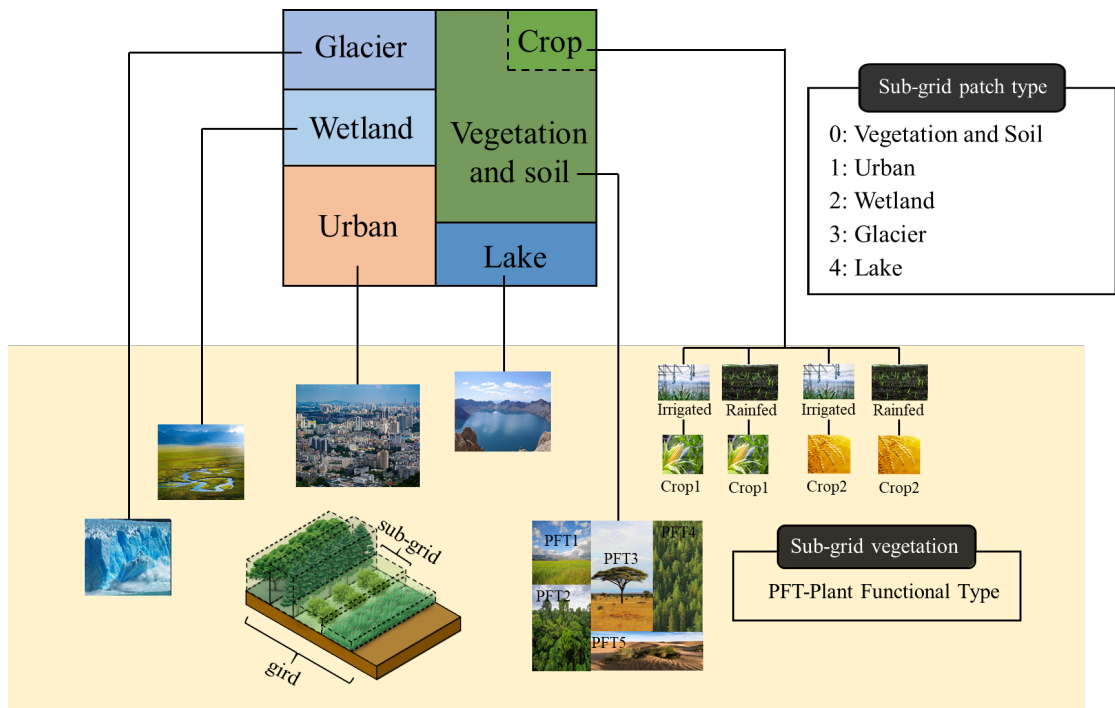

14    **Figure S1.** Diagram of the sub-grid structure in the Common Land Model.

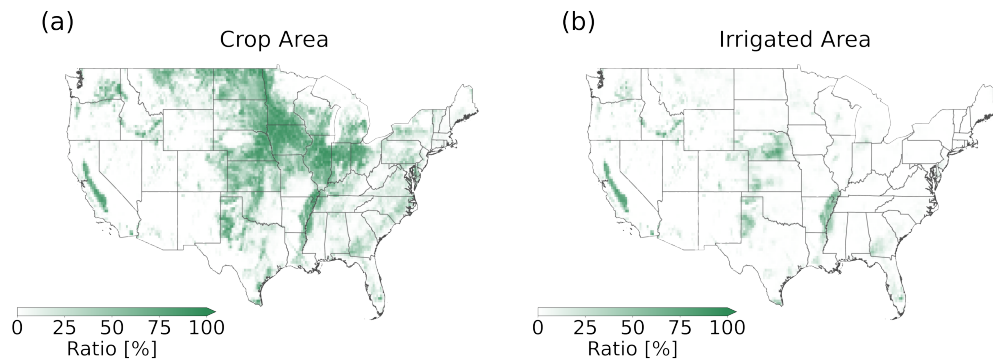

16    **Figure S2.** Spatial distribution of crop and irrigated area percentages within the study region. (a)  
17    Percentage of crop area. (b) Percentage of irrigated area.

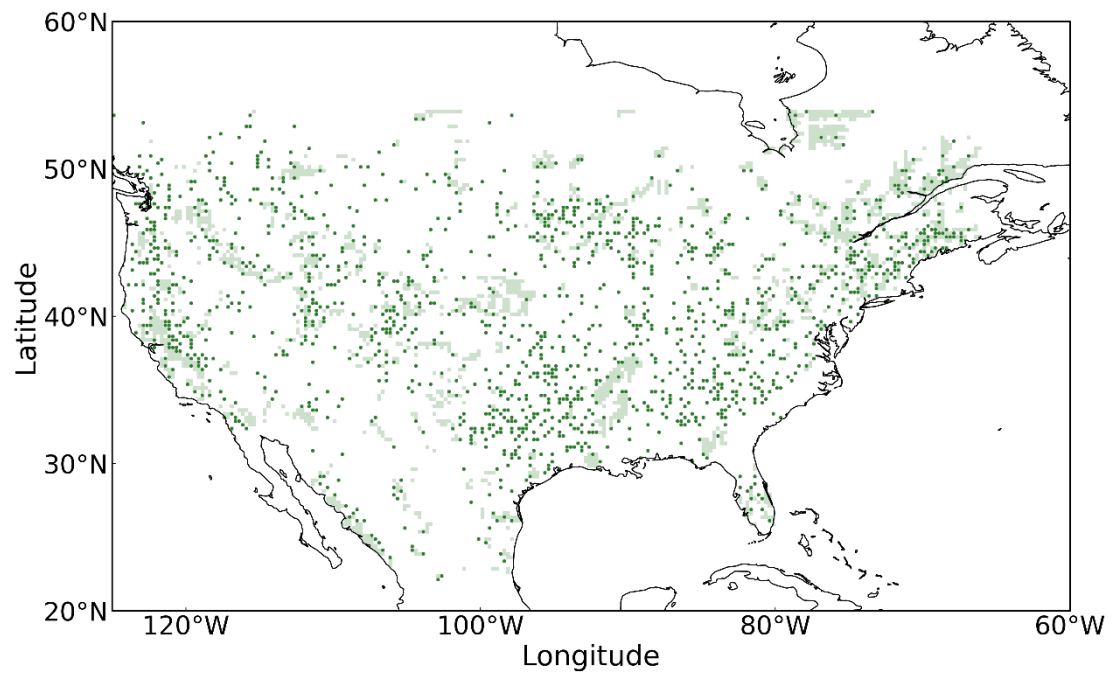

18

19 **Figure S3.** Locations of reservoirs and associated irrigated areas within the study region.

20 Reservoir locations are marked with green dots, and the corresponding irrigated areas are shown

21 in light green.

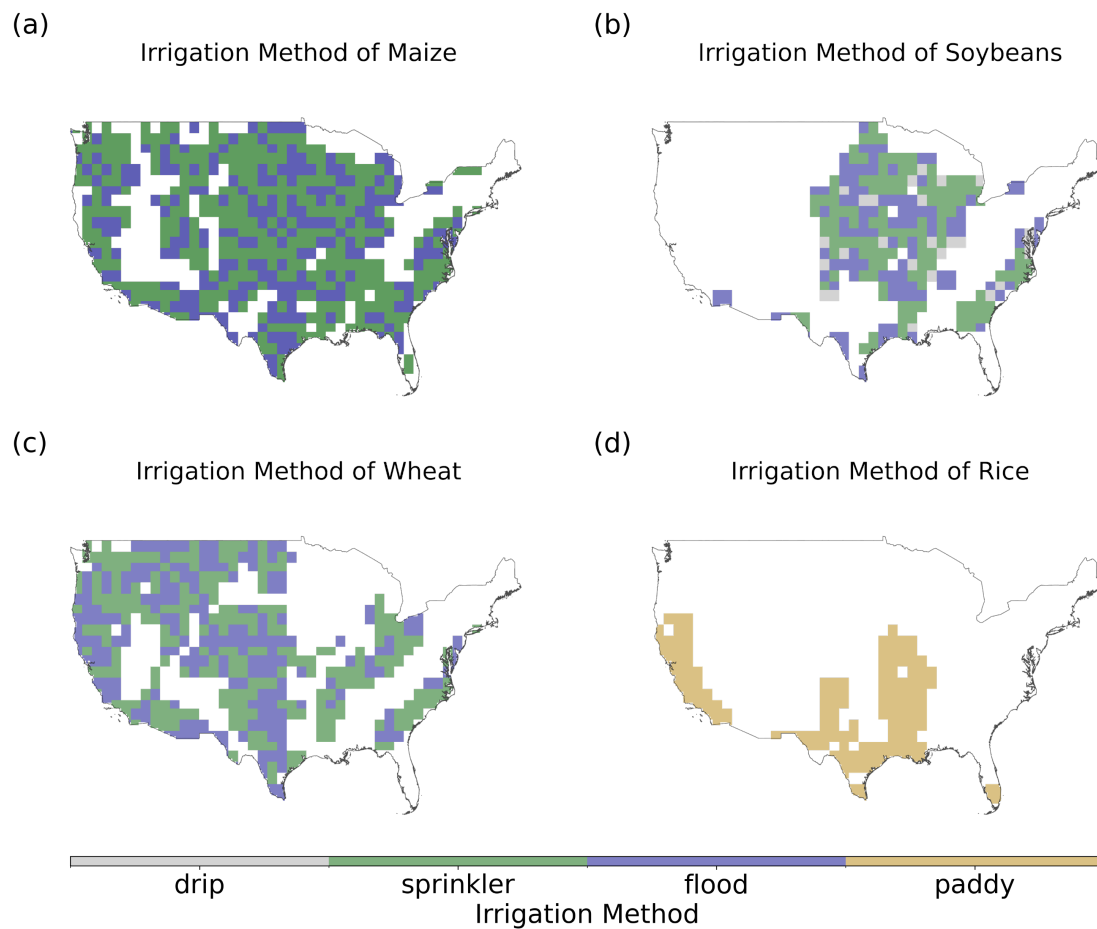

22

23 **Figure S4.** Irrigation methods for four crops across the study region. (a) Maize. (b) Soybeans. (c)

24 Wheat. (d) Rice.



## Groundwater Equipment Ratio

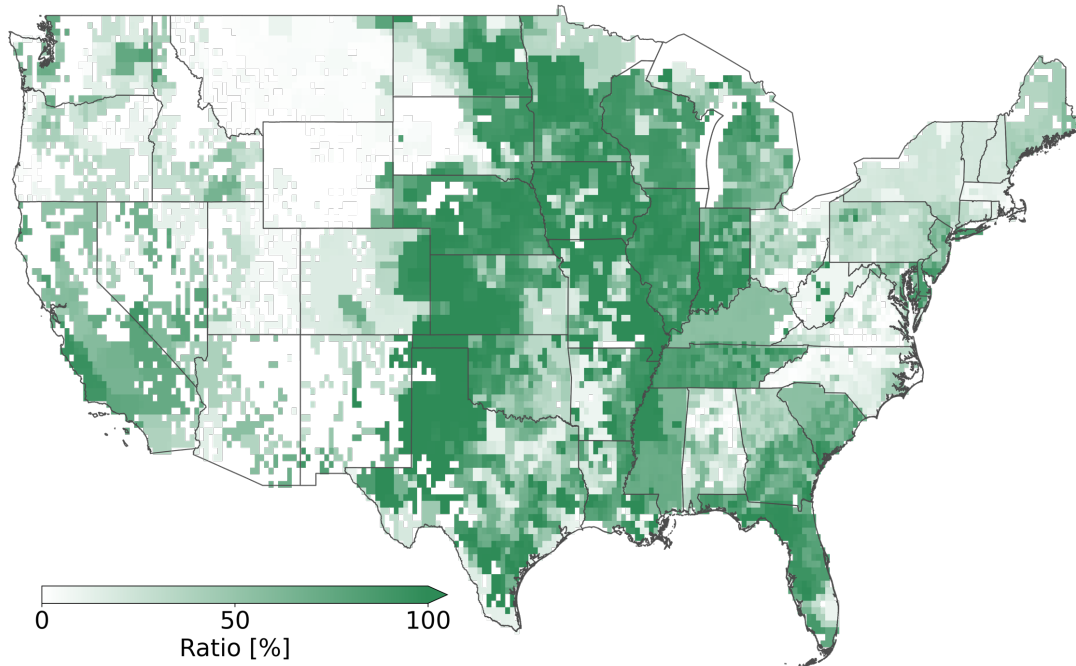

**Figure S5.** Percentage of area equipped with groundwater irrigation systems within the study region.

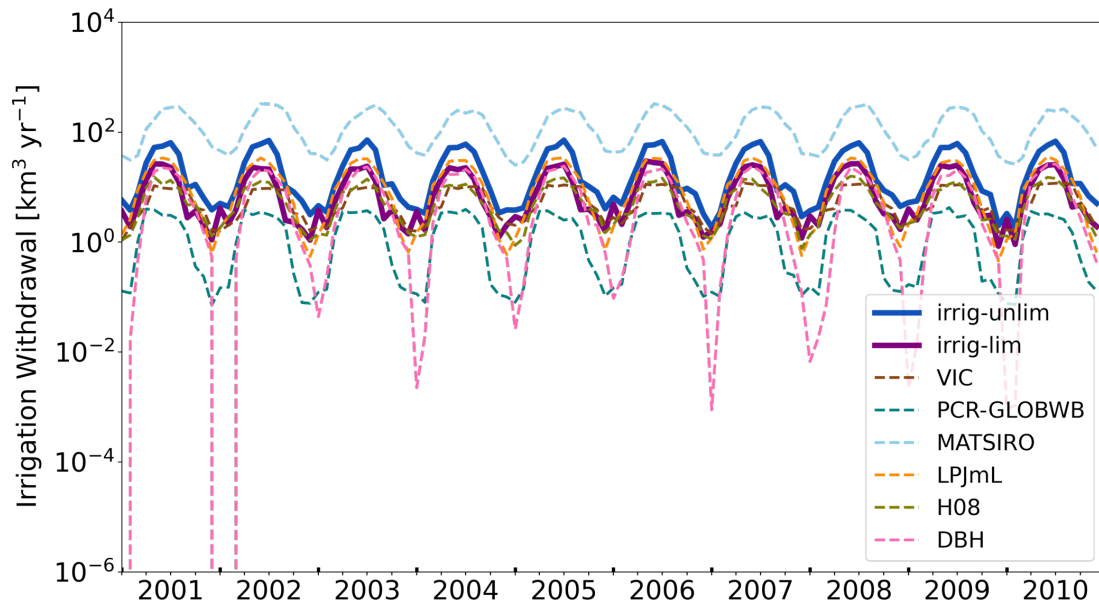

**Figure S6.** Time series of monthly total irrigation water withdrawal in the United States from 2001 to 2010, simulated by CoLM and the six global hydrological models participating in ISIMIP2a.

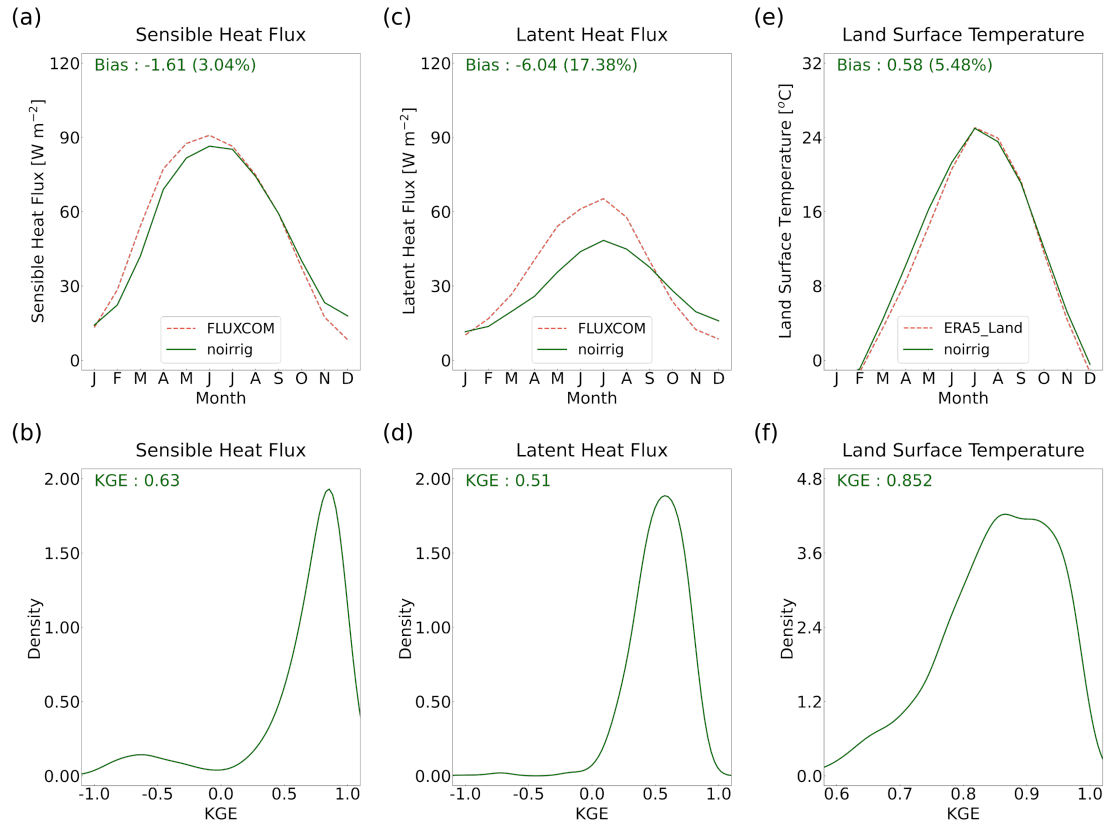

32

33 **Figure S7.** Evaluation of simulated energy fluxes and land surface temperature in the non-  
 34 irrigation region. (a) Monthly sensible heat flux averaged from 2001 to 2016, based on the  
 35 FLUXCOM dataset and simulated by CoLM using the noirrig scheme in non-irrigation regions of  
 36 the United States, with the bias between simulations and observations (i.e., FLUXCOM) indicated  
 37 in the panel. (b) Same as (a) but for latent heat flux. (c) Same as (a) but for land surface  
 38 temperature, using data from ERA5-Land reanalysis dataset. (d) Kernel density estimate (KDE)  
 39 curves for the Kling-Gupta efficiency (KGE) between observed and simulated monthly sensible  
 40 heat flux for each non-irrigation grid, with mean KGE value indicated in the panel. (e-f) Same as  
 41 (d) but for latent heat flux and land surface temperature.

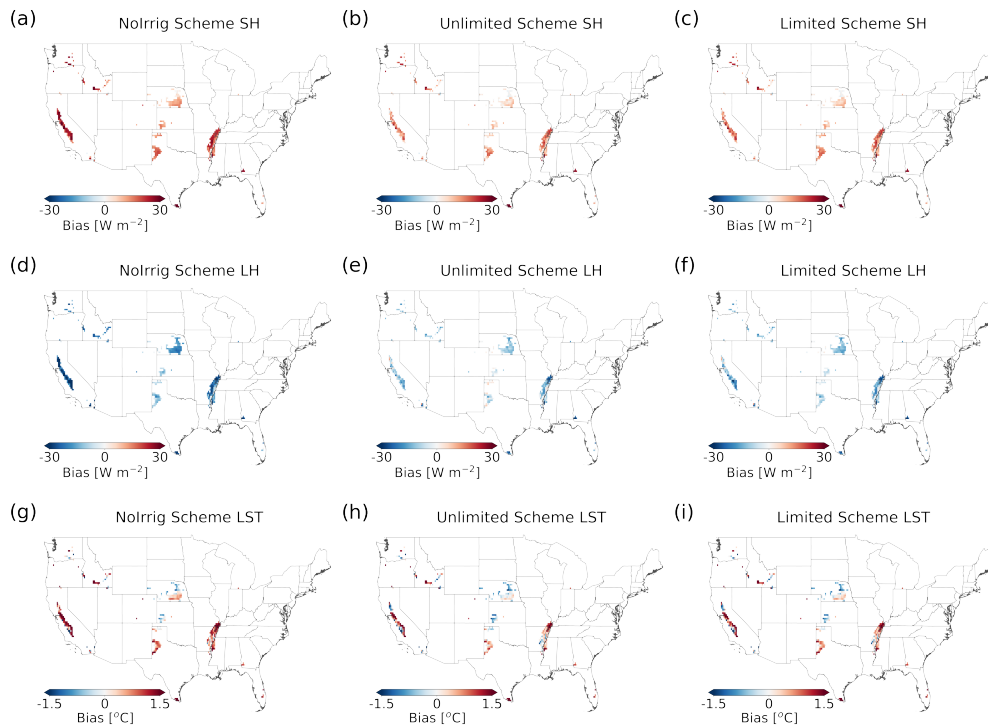

42

43 **Figure S8.** Evaluation of simulated energy fluxes and land surface temperature in the irrigation  
 44 region. (a) Bias between observed monthly sensible heat flux and simulations from CoLM under  
 45 the noirrig scheme in irrigation regions of the United States. (b) Same as (a) but for irrig-unlim  
 46 scheme. (c) Same as (a) but for irrig-lim scheme. (d-f) Same as (a-c) but for latent heat flux. (g-i)  
 47 Same as (a-c) but for or land surface temperature.

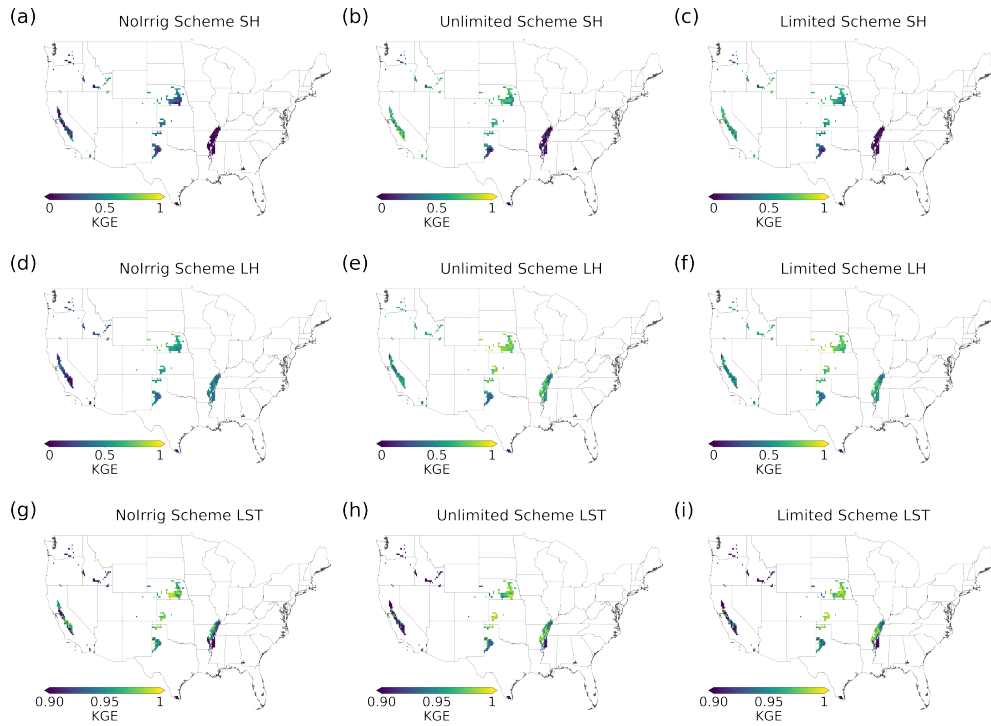

48

49 **Figure S9.** Evaluation of simulated energy fluxes and land surface temperature in the irrigation  
50 region. (a) The Kling-Gupta efficiency (KGE) between observed monthly sensible heat flux and  
51 simulations from CoLM under the noirrig scheme in irrigation regions of the United States. (b)  
52 Same as (a) but for irrig-unlim scheme. (c) Same as (a) but for irrig-lim scheme. (d-f) Same as (a-  
53 c) but for latent heat flux. (g-i) Same as (a-c) but for or land surface temperature.

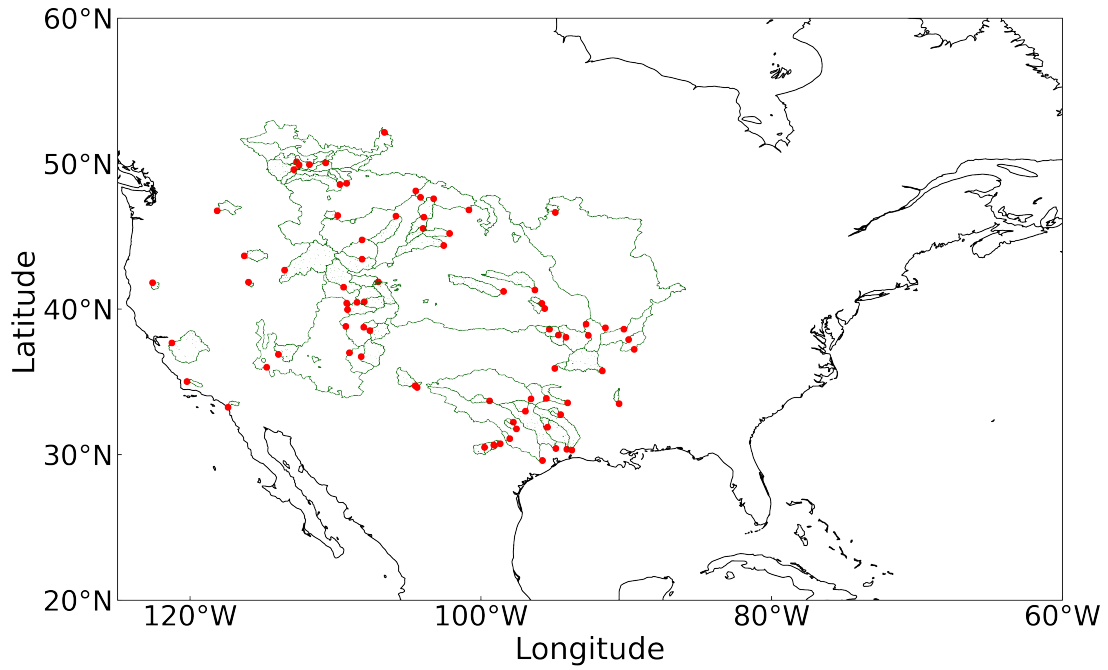

**Figure S10.** Locations of catchment outlets and boundaries of the 77 irrigation-affected catchments.

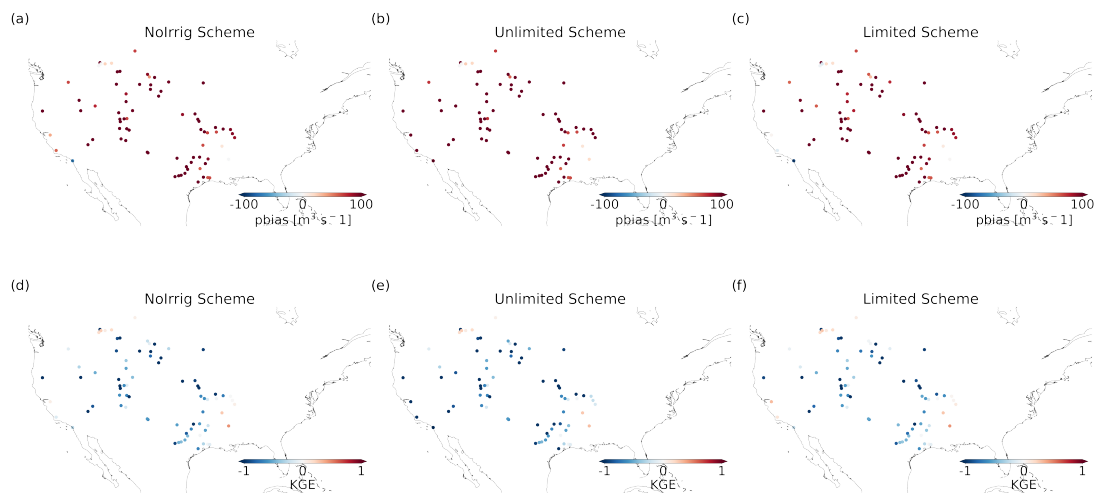

**Figure S11.** Evaluation of simulated streamflow in 77 irrigation-affected catchments. (a) Percentage bias (PBIAS) between observed monthly streamflow and simulations from CoLM under the noirrig scheme for each catchment. (b) Same as (a) but for irrig-unlim scheme. (c) Same as (a) but for irrig-lim scheme. (d-f) Same as (a-c) but for the Kling-Gupta efficiency (KGE) between simulated and observed streamflow.

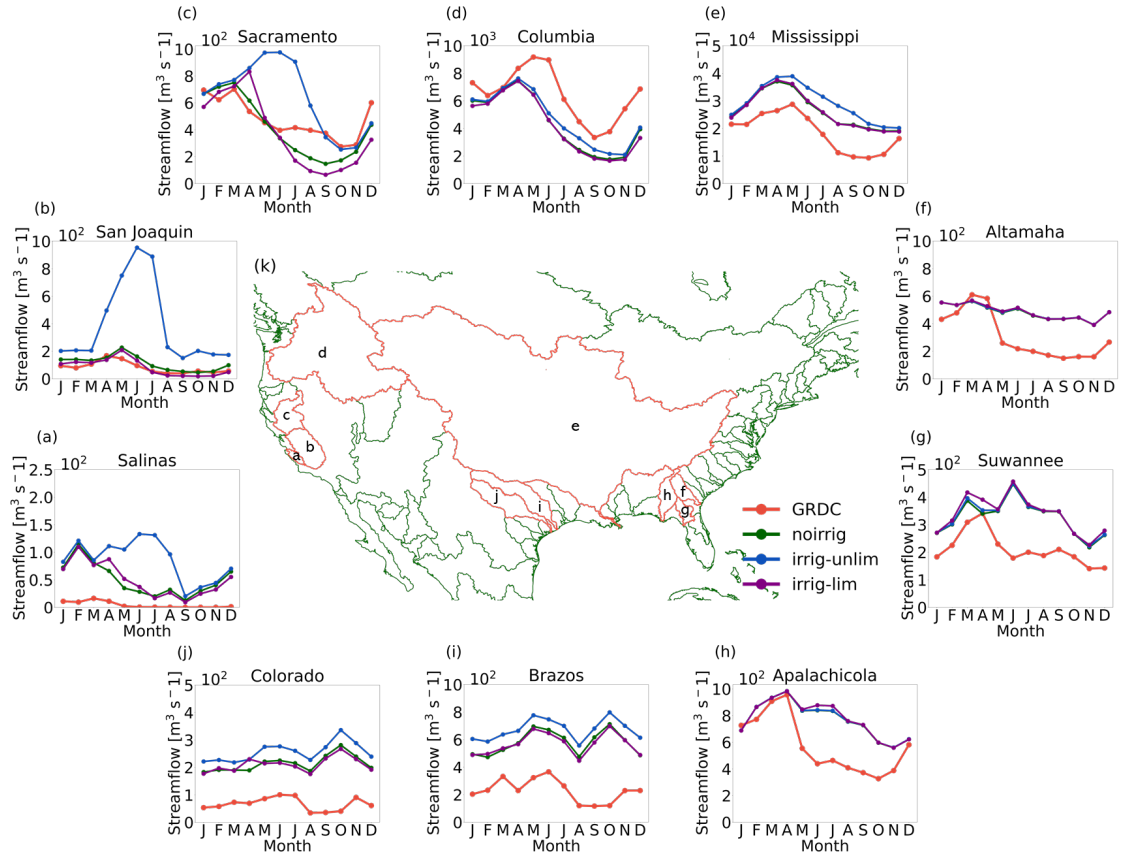

**Figure S12.** Evaluation of simulated streamflow in 10 large irrigation-affected catchments. (a-j) Monthly streamflow averaged from 2001 to 2016 for each catchment, based on GRDC dataset (red lines) and simulated by CoLM using the noirrig (green lines), irrig-unlim (blue lines), and irrig-lim schemes (purple lines). (k) Boundaries of the selected 10 irrigation-affected catchments (red lines).

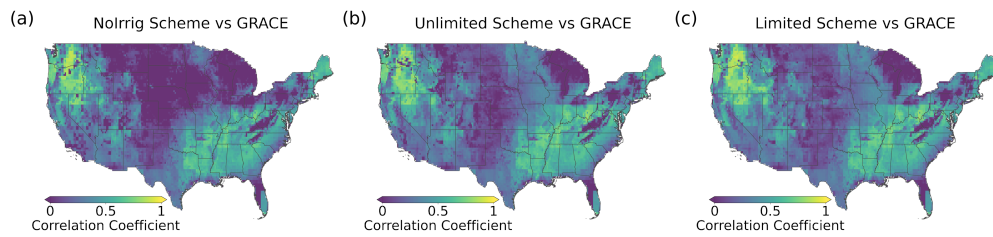

**Figure S13.** Comparison of observed and simulated monthly terrestrial water storage anomalies in the United States. (a) Spatial distribution of the Pearson correlation coefficient ( $r$ ) between GRACE-derived TWS anomalies (JPL dataset) and CoLM simulations under the noirrig scheme. (b-c) Same as (a) but for the irrig-unlim and irrig-lim schemes, respectively.

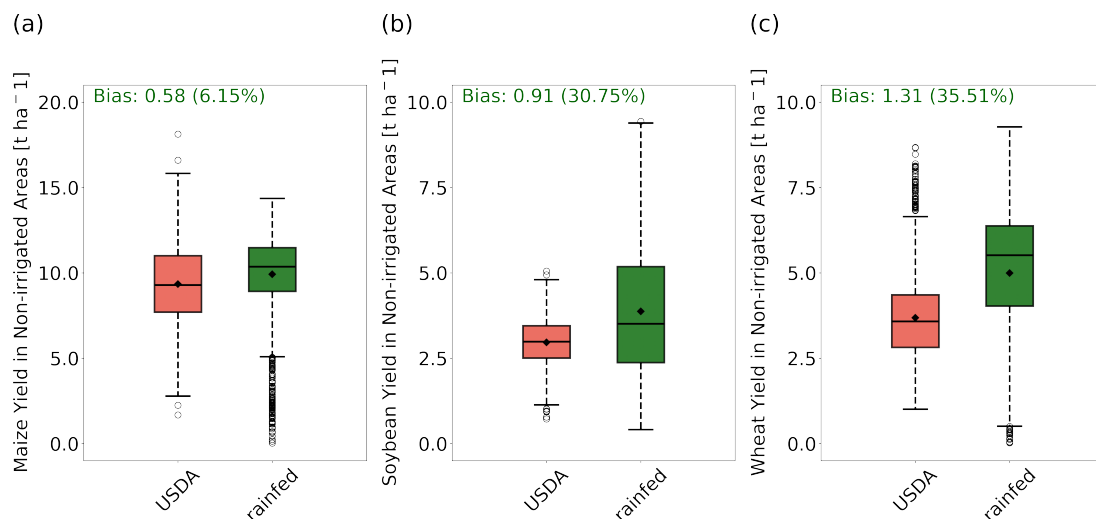

74

75 **Figure S14.** Evaluation of crop yield simulated in the United States. (a) Maize yield in rainfed  
76 maize-growing regions of the United States, as reported by the USDA (orange boxes), compared  
77 with simulations by CoLM in the non-irrigation region (green boxes). Since reported yields are at  
78 the county scale, grid-based simulation results were aggregated to corresponding counties. The  
79 boxes represent the interquartile range, black lines indicate median values, black dots show mean  
80 values, and dashed black whiskers extend to 1.5 times the interquartile range; points outside the  
81 boxes represent outliers. (b-c) Same as (a) but for soybean and wheat yields.

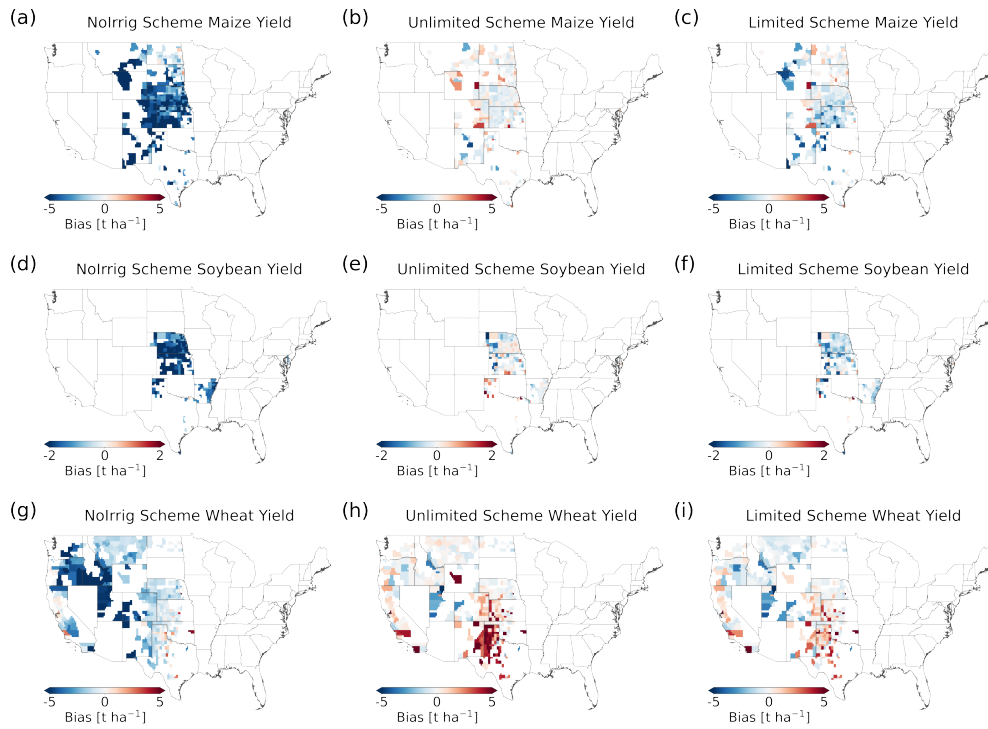

82

83 **Figure S15.** Evaluation of simulated crop yield in the irrigation region. (a) Bias between observed  
 84 maize yield and simulations from CoLM under the noirrig scheme in irrigation regions of the  
 85 United States. (b) Same as (a) but for irrig-unlim scheme. (c) Same as (a) but for irrig-lim scheme.  
 86 (d-f) Same as (a-c) but for soybean yield. (g-i) Same as (a-c) but for or wheat yield.

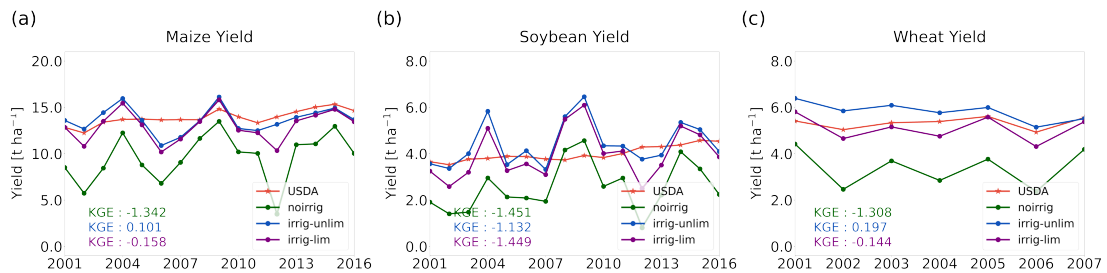

87

88 **Figure S16.** Comparison of observed and simulated annual yield variations for three crops in the  
 89 United States. (a) Annual maize yield in irrigated maize-growing regions of the United States from  
 90 2001 to 2016, as reported by the USDA (orange lines), compared with simulations by CoLM using  
 91 the noirrig (green lines), irrig-unlim (blue lines), and irrig-lim (purple lines) schemes. KGE values  
 92 for the three simulation schemes are indicated in the panel. (b-c) Same as (a), but for annual  
 93 soybean and wheat yields.



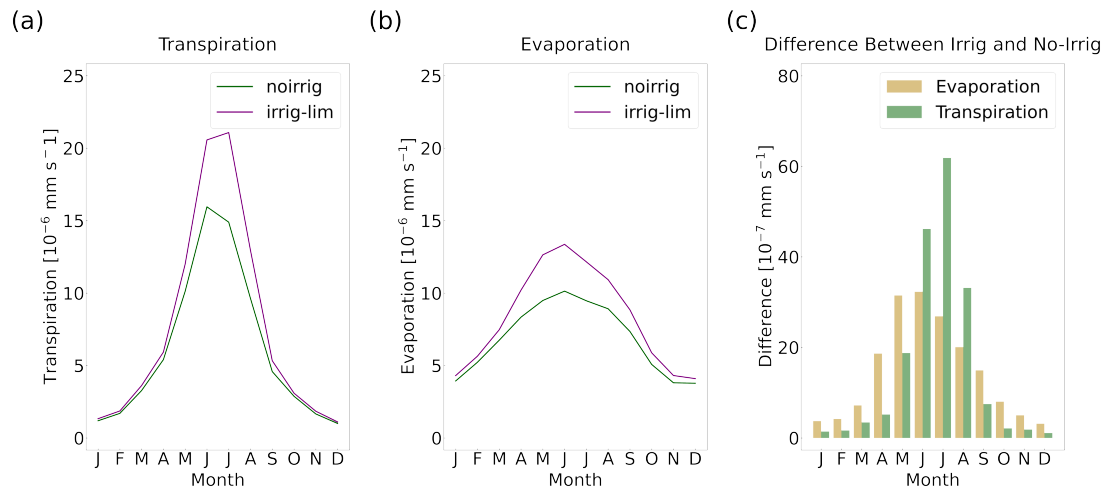

94

95 **Figure S17.** Differences in simulated evaporation and transpiration with and without irrigation. (a-  
 96 b) Monthly transpiration (a) and evaporation (b) averaged from 2001 to 2016, simulated by CoLM  
 97 using the noirrig and irrig-lim schemes in irrigation regions of the United States. (c) Monthly  
 98 average differences in simulated transpiration and evaporation between the noirrig and irrig-lim  
 99 schemes.

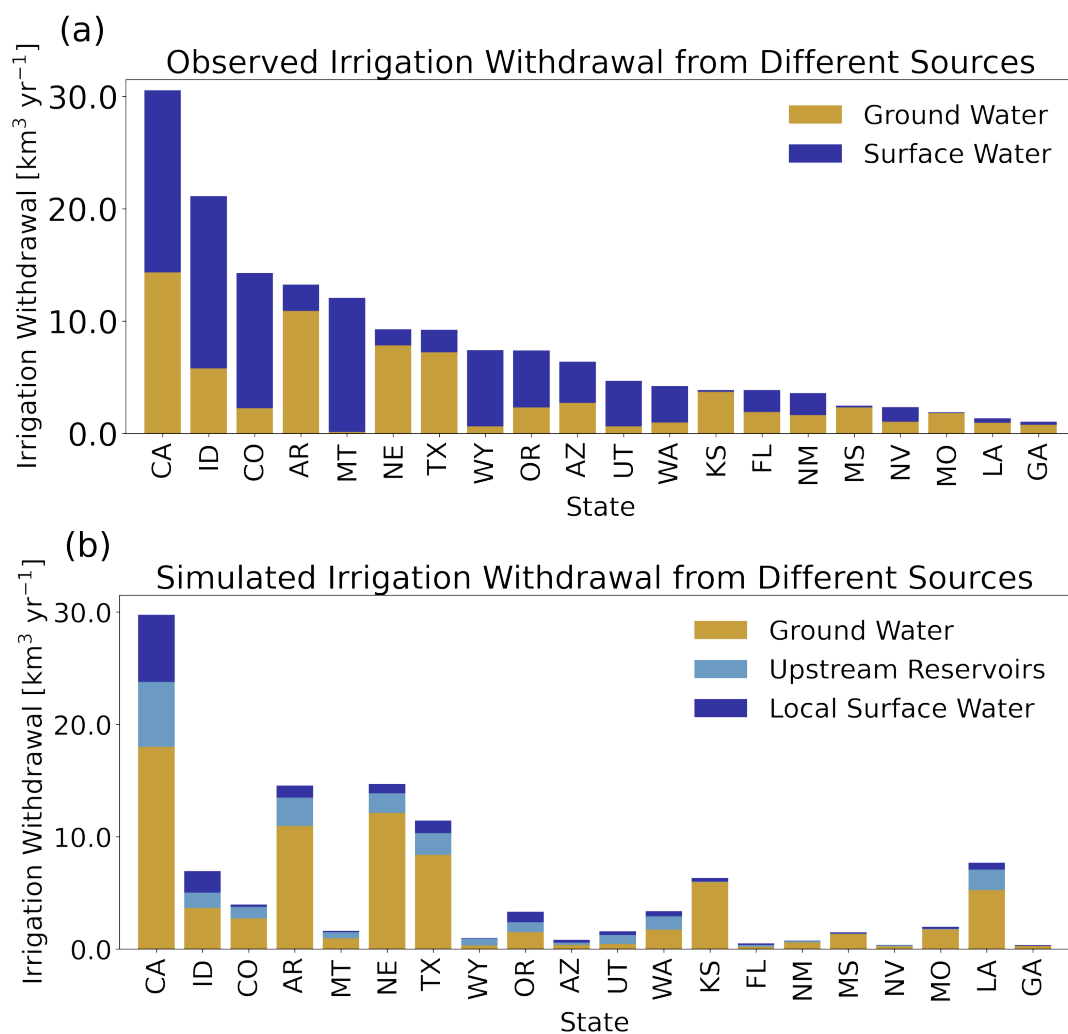

**Figure S18.** Comparison of reported and simulated annual irrigation water withdrawal by water source. (a) Annual withdrawal amounts from different sources for the top 20 states by irrigation water withdrawal, using data from USGS reports. (b) Same as (a), but for simulated by CoLM using the irrig-lim scheme.

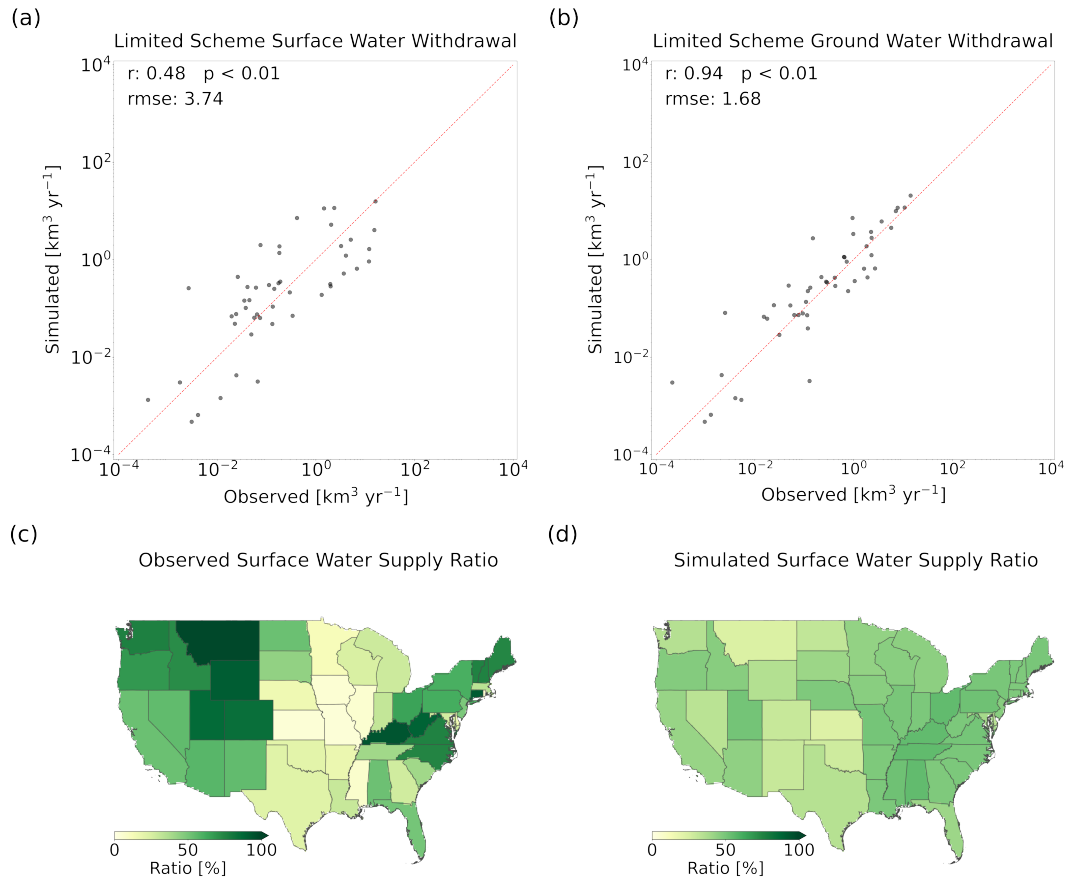

**Figure S19.** Comparison of reported and simulated irrigation water withdrawal in the United States by water source using a sequential water withdrawal method. (a) Proportion of surface water in irrigation withdrawal based on USGS reports for individual states. (b) Proportion of surface water in irrigation withdrawal simulated by CoLM for individual states using the sequential water withdrawal method. In this approach, water demand is not pre-allocated between surface and groundwater sources but is met sequentially, with surface water withdrawn first, followed by groundwater.

## 2. Supplementary Tables

**Table S1.** Key differences among various irrigation methods.

| Feature                                      | Drip                  | Sprinkler           | Flood                    | Paddy                |
|----------------------------------------------|-----------------------|---------------------|--------------------------|----------------------|
| Irrigation trigger $\theta_{\text{trigger}}$ | $\Phi_{\text{sfc}}^*$ | $\Phi_{\text{sfc}}$ | $\Phi_{\text{sfc}}^{**}$ | $\Phi_0$             |
| Irrigation target $\theta_{\text{target}}$   | $\Phi_{\text{sfc}}$   | $\Phi_{\text{sfc}}$ | $\Phi_0$                 | $\Phi_0$             |
| Water application location                   | Surface               | Above the canopy    | Surface                  | Surface with ponding |

\*  $\Phi_{\text{sfc}}$  represents field capacity, \*\*  $\Phi_0$  represents soil saturation.

**Table S2.** Total storage capacity and irrigation area of reservoirs of different scales (Ministry of Water Resources of China, 2017).

| Engineering Grade | Reservoir Scale | Total Storage Capacity (billion m <sup>3</sup> ) | Irrigation Area (100,000 mu)* |
|-------------------|-----------------|--------------------------------------------------|-------------------------------|
| I                 | Large (Type 1)  | > 10                                             | > 150                         |
| II                | Large (Type 2)  | 10 - 1                                           | 150 - 50                      |
| III               | Medium          | 1 - 0.1                                          | 50 - 5                        |
| IV                | Small (Type 1)  | 0.1 - 0.01                                       | 5 - 0.5                       |
| V                 | Small (Type 2)  | 0.01 - 0.001                                     | < 0.5                         |

\* mu is a unit of area (1 mu  $\approx$  666.67 square meters).

**Table S3.** Observed and simulated irrigation water withdrawals (km<sup>3</sup> yr<sup>-1</sup>).

| Sources     | USGS   | irrig-unlim | irrig-lim |
|-------------|--------|-------------|-----------|
| Total       | 166.23 | 290.94      | 120.81    |
| Surface     | 92.60  | NA          | 37.78     |
| Groundwater | 73.63  | NA          | 81.43     |

### 3. Supplementary Text

#### 3.1 Evaluation of crop phenology

We selected multiple crop sites from FLUXNET and AmeriFlux, with details provided in the Table S4, including only stations where the same crop had been sown for more than two years. The results indicate that the model effectively captures the seasonal dynamics of LAI across different sites, regardless of whether the crops are rainfed or irrigated (Figures S20 and S21). However, LAI values were underestimated at certain site years, such as US-Ne3 in 2002 and 2006, when rainfed soybean was planted (Figure S20 (d and f)). The underestimation is primarily due to the proximity of US-Ne3 to irrigated sites (US-Ne1 and US-Ne2), where soil moisture conditions may be influenced by nearby irrigation. In contrast, the simulated LAI for rainfed soybean at US-IB1 closely aligns with observed values.

**Table S4.** Stations information.

| station                         | location          | LAI years           | crop type       | irrigation management |
|---------------------------------|-------------------|---------------------|-----------------|-----------------------|
| US-Ne1<br>(Suyker, 2024a)       | 41.18N,<br>96.44W | 2002; 2004;<br>2006 | maize           | irrigated             |
| US-Ne2<br>(Suyker, 2024b)       | 41.16N,<br>96.47W | 2002, 2004,<br>2006 | soybean         | irrigated             |
| US-Ne3<br>(Suyker, 2024c)       | 41.18N,<br>96.44W | 2001, 2003,<br>2005 | maize           | rainfed               |
| US-Ne3<br>(Suyker, 2024c)       | 41.18N,<br>96.44W | 2002, 2004,<br>2006 | soybean         | rainfed               |
| US-IB1<br>(Matamala, 2019)      | 41.86N,<br>88.22W | 2005; 2007          | soybean         | rainfed               |
| US-ARM<br>(Biraud et al., 2024) | 36.61N,<br>97.49W | 2005; 2008          | maize           | rainfed               |
| US-ARM<br>(Biraud et al., 2024) | 36.61N,<br>97.49W | 2002; 2008          | winter<br>wheat | rainfed               |

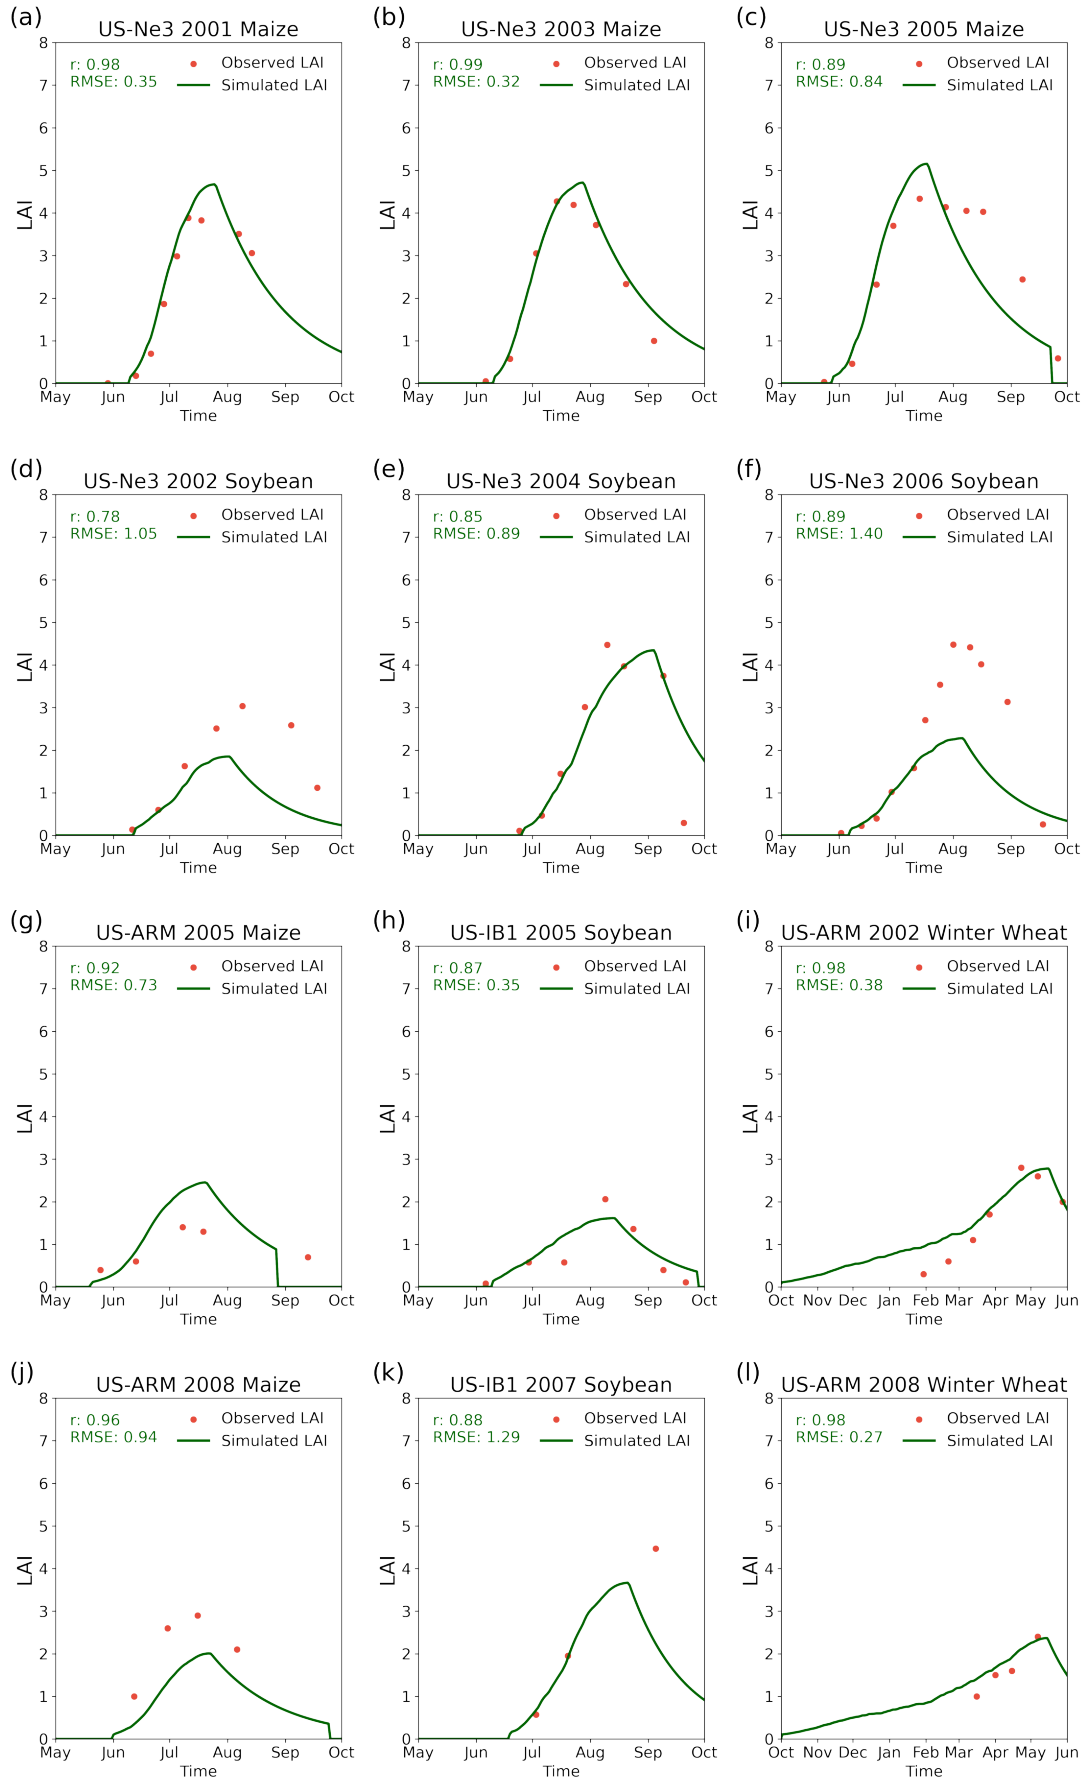

135 **Figure S20.** Comparison of reported and simulated LAI phenology at rainfed stations. (a) US-Ne3  
 136 for maize in 2001, as reported by the AmeriFlux (red dots), compared with simulations by CoLM  
 137 without irrigation (green line). (b-c) Same as (a) but in 2003 and 2005. (d-f) Same as (a) but for  
 138 soybean in 2002, 2004 and 2006. (g) and (j) Same as (a) but for maize at US-ARM in 2005 and  
 139 2008. (h) and (k) Same as (a) but for soybean at US-IB1 in 2005 and 2007. (i) and (l) Same as (a)  
 140 but for winter wheat at US-ARM in 2002 and 2008.

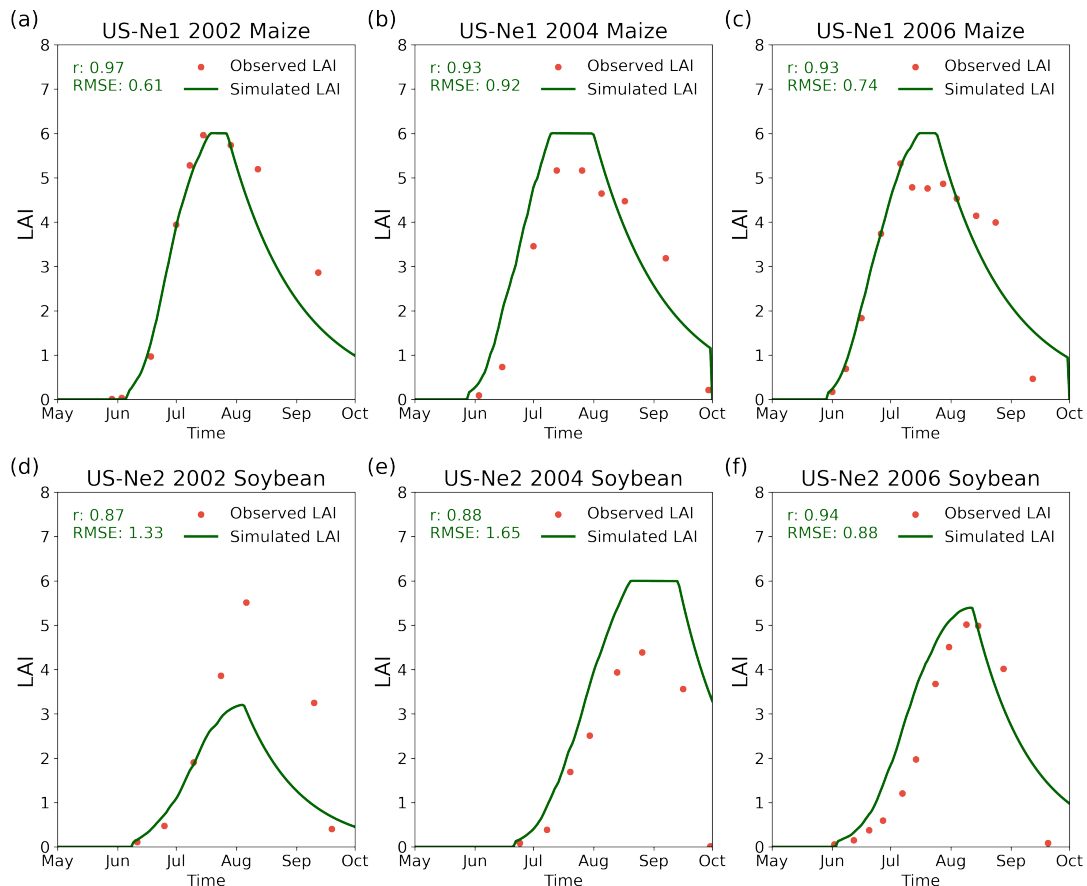

141

142 **Figure S21.** Comparison of observed and simulated LAI phenology at irrigated stations. (a-c) US-  
 143 Ne1 for maize in 2002, 2004 and 2006, as reported by the AmeriFlux (red dots), compared with  
 144 simulations by CoLM with irrigation (green line). (d-f) Same as (a-c) but for soybean at US-Ne2  
 145 in 2002, 2004 and 2006.

#### 4. Supplementary References

- Ministry of Water Resources of China: Standard for rank classification and flood protection criteria of water and hydropower projects, SL 252–2017, <http://121.36.94.83:9008/jsp/yishenqing/appladd/biaozhunfile/detail.jsp?bzbh=SL%2B252-2017#> (last access: October 2023), 2017
- Suyker, A.: AmeriFlux BASE US-Ne1 Mead - irrigated continuous maize site, Ver. 18-5, AmeriFlux AMP, [Dataset], <https://doi.org/10.17190/AMF/1246084>, 2024a
- Suyker, A.: AmeriFlux BASE US-Ne2 Mead - irrigated maize-soybean rotation site, Ver. 18-5, AmeriFlux AMP, [Dataset], <https://doi.org/10.17190/AMF/1246085>, 2024b
- Suyker, A.: AmeriFlux BASE US-Ne3 Mead - rainfed maize-soybean rotation site, Ver. 18-5, AmeriFlux AMP, [Dataset], <https://doi.org/10.17190/AMF/1246086>, 2024c
- Matamala, R.: AmeriFlux BASE US-IB1 Fermi National Accelerator Laboratory- Batavia (Agricultural site), Ver. 8-5, AmeriFlux AMP, [Dataset], <https://doi.org/10.17190/AMF/1246065>, 2019
- Biraud, S., Fischer, M., Chan, S., and Torn, M.: AmeriFlux BASE US-ARM ARM Southern Great Plains site- Lamont, Ver. 13-5, AmeriFlux AMP, [Dataset], <https://doi.org/10.17190/AMF/1246027>, 2024
