# Supplementary material for: Representation of a two-way coupled irrigation system in the Common Land Model
Source: Copernicus journal article supplement (doi:10.5194/egusphere-2024-4093), 2025-01-22
Supplement: Supplementary file 2 [file egusphere-2024-4093-supplement.pdf]

1  
2  
3  
4  
5  
6  
7  
8  
9  
10  
11

## Supplementary Information for

# Representation of a two-way coupled irrigation system in the Common Land Model

Shulei Zhang<sup>1,#</sup>, Hongbin Liang<sup>1,#</sup>, Fang Li<sup>2</sup>, Xingjie Lu<sup>1</sup>, Yongjiu Dai<sup>1</sup>

<sup>1</sup> *Southern Marine Science and Engineering Guangdong Laboratory (Zhuhai), School of Atmospheric Sciences, Sun Yat-sen University, Guangzhou, China*

<sup>2</sup> *International Center for Climate and Environment Sciences, Institute of Atmospheric Physics, Chinese Academy of Sciences, Beijing, 100029, China*

*Corresponding Author: Shulei Zhang (zhangshlei@mail.sysu.edu.cn) & Hongbin Liang (lianghb25@mail2.sysu.edu.cn)*

*# These authors contributed equally to this work.*

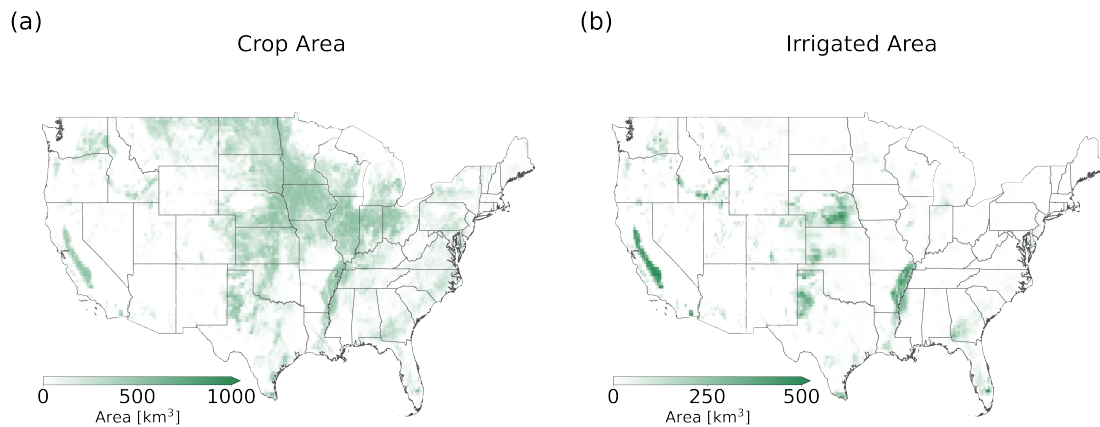

12

13 **Figure S1.** Spatial distribution of crop areas and irrigated areas within the study  
 14 region. (a) Crop areas. (b) Irrigated areas.

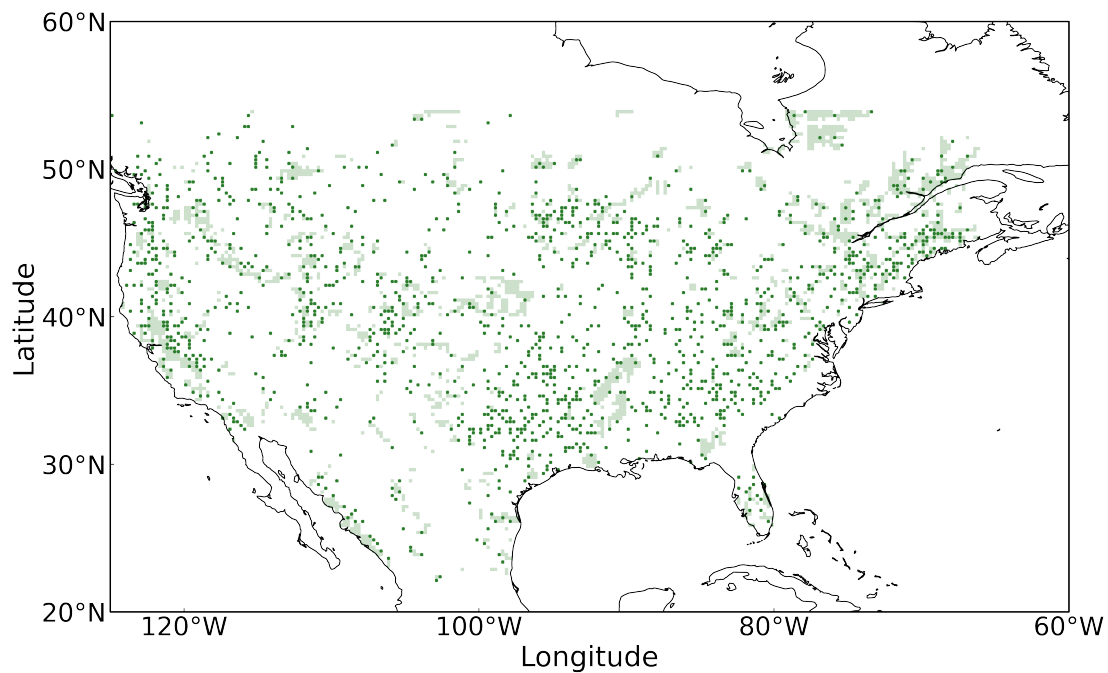

15

16 **Figure S2.** Locations of reservoirs and associated irrigated areas within the study  
 17 region. Reservoir locations are marked with green dots, and the corresponding  
 18 irrigated areas are shown in light green.

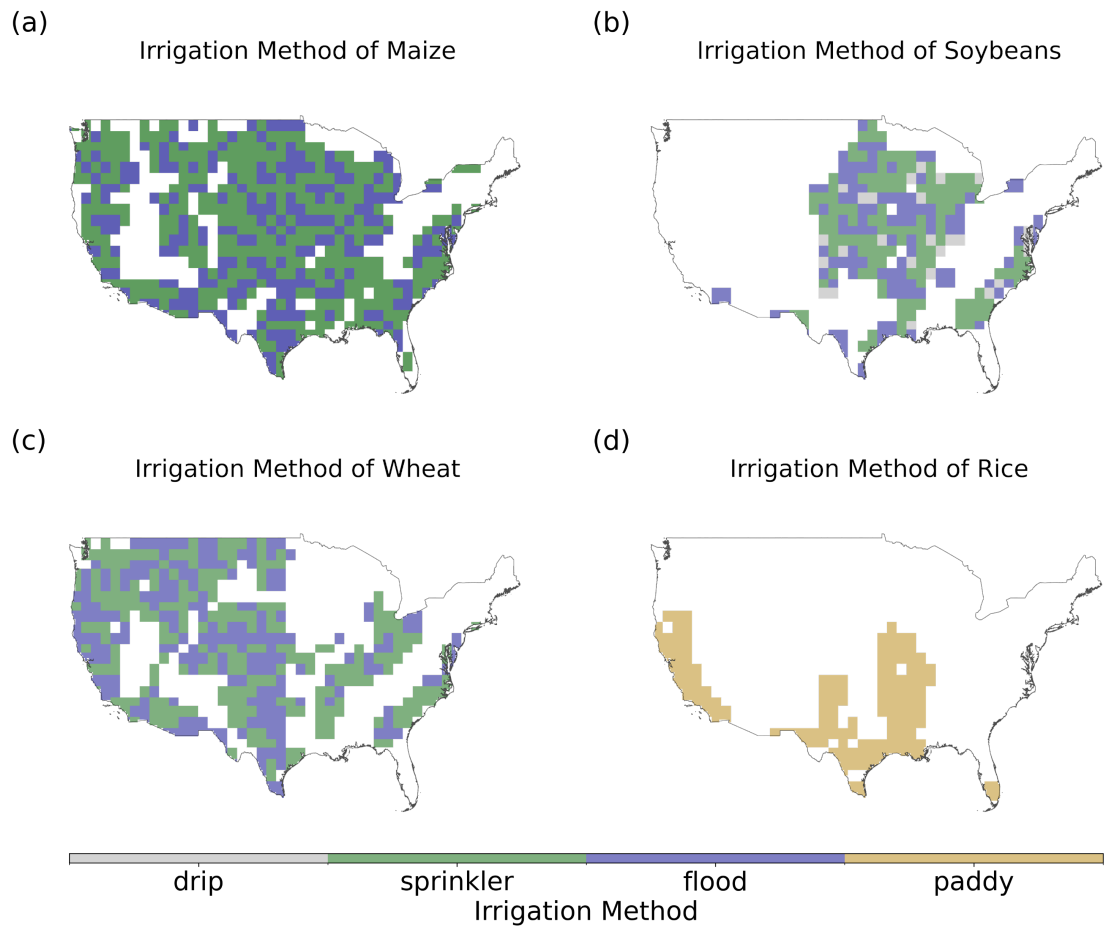

19

20 **Figure S3.** Irrigation methods for four crops across the study region. (a) Maize. (b)  
 21 Soybeans. (c) Wheat. (d) Rice.

## Groundwater Equipment Ratio

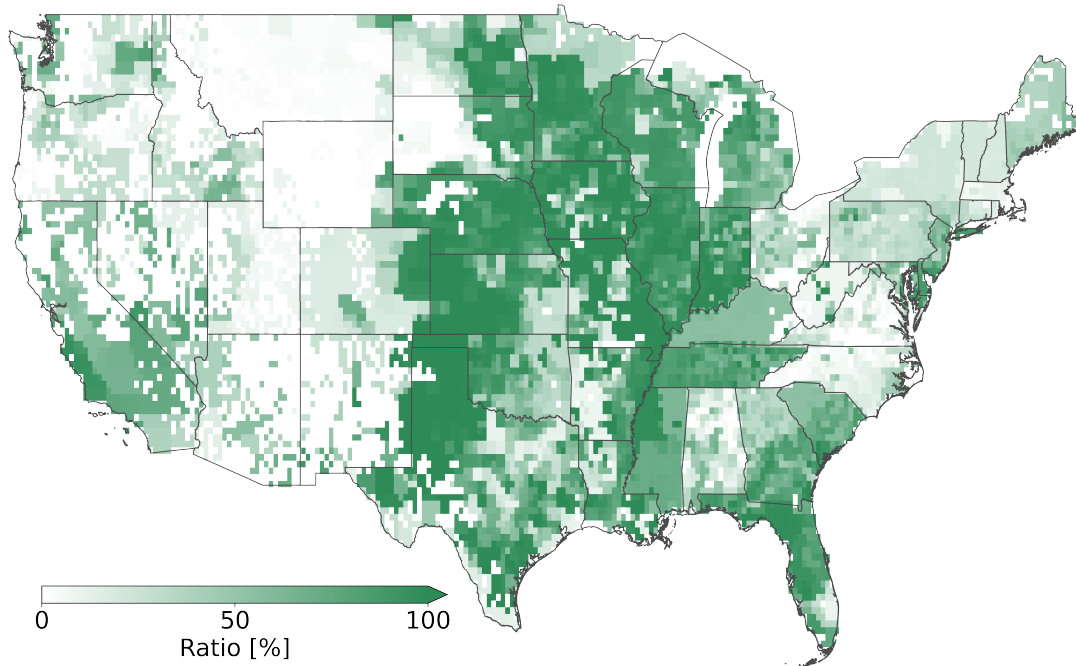

22

23 **Figure S4.** Percentage of area equipped with groundwater irrigation systems within  
24 the study region.

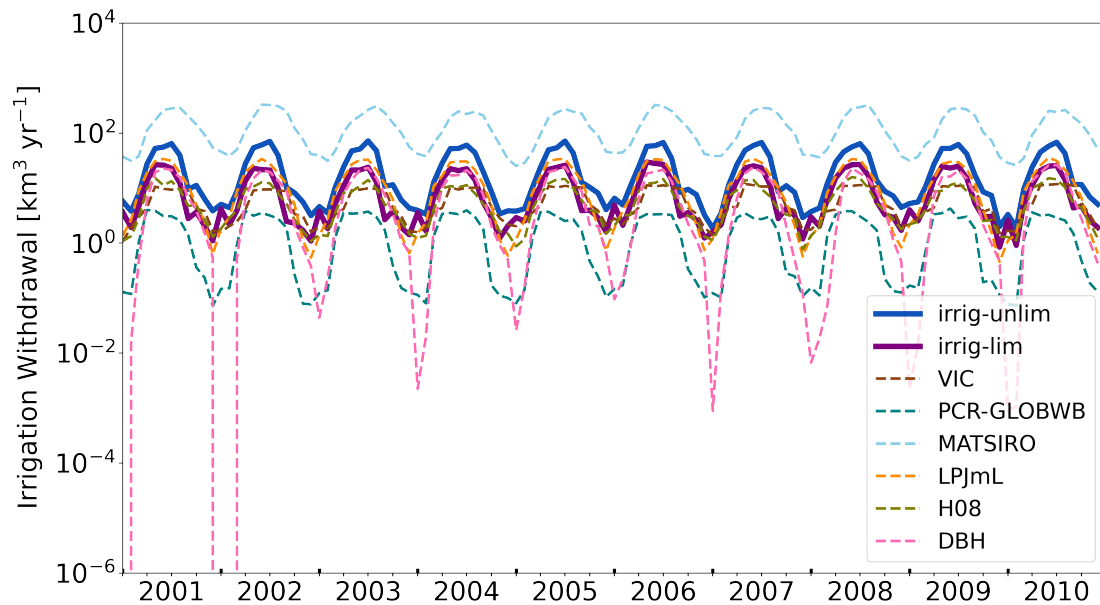

25

26 **Figure S5.** Time series of monthly total irrigation water withdrawal in the United  
27 States from 2001 to 2010, simulated by CoLM and the six global hydrological models  
28 participating in ISIMIP2a.

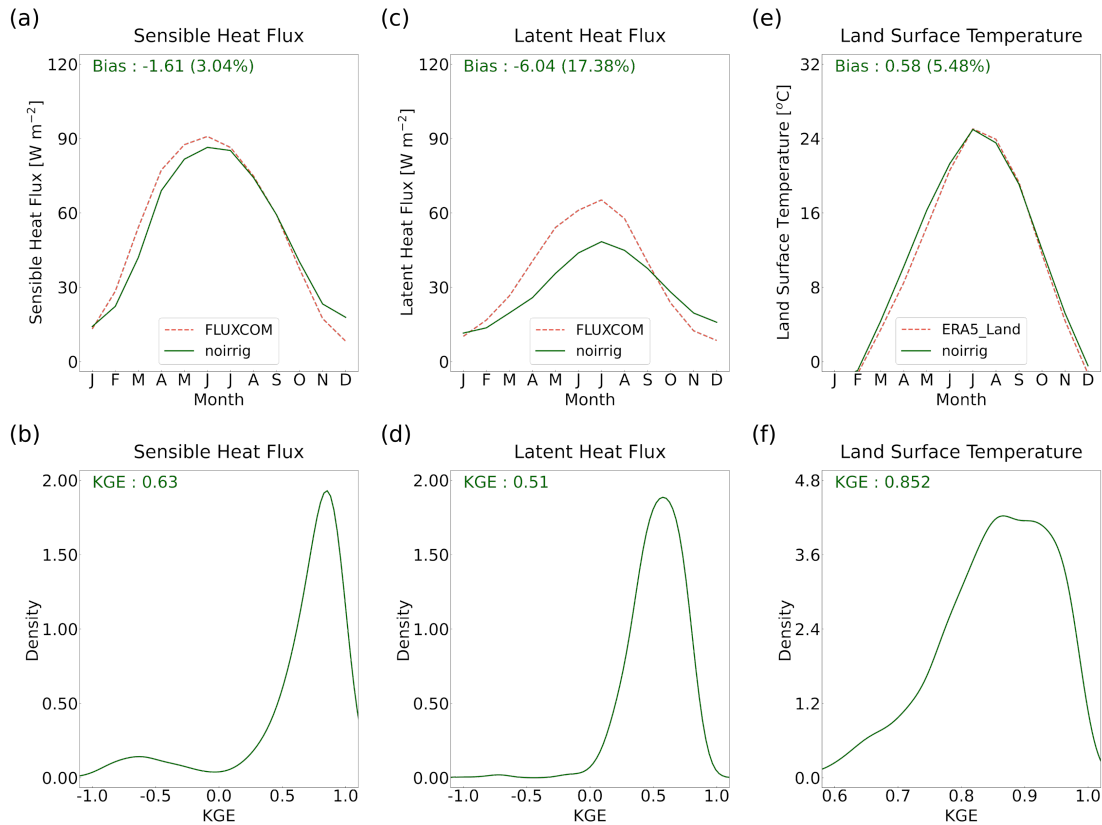

29

30 **Figure S6.** Evaluation of simulated energy fluxes and land surface temperature in the  
 31 non-irrigation region. (a) Monthly sensible heat flux averaged from 2001 to 2016,  
 32 based on the FLUXCOM dataset and simulated by CoLM using the noirrig scheme in  
 33 non-irrigation regions of the United States, with the bias between simulations and  
 34 observations (i.e., FLUXCOM) indicated in the panel. (b) Same as (a) but for latent  
 35 heat flux. (c) Same as (a) but for land surface temperature, using data from ERA5-  
 36 Land reanalysis dataset. (d) Kernel density estimate (KDE) curves for the Kling-  
 37 Gupta efficiency (KGE) between observed and simulated monthly sensible heat flux  
 38 for each non-irrigation grid, with mean KGE value indicated in the panel. (e-f) Same  
 39 as (d) but for latent heat flux and land surface temperature.

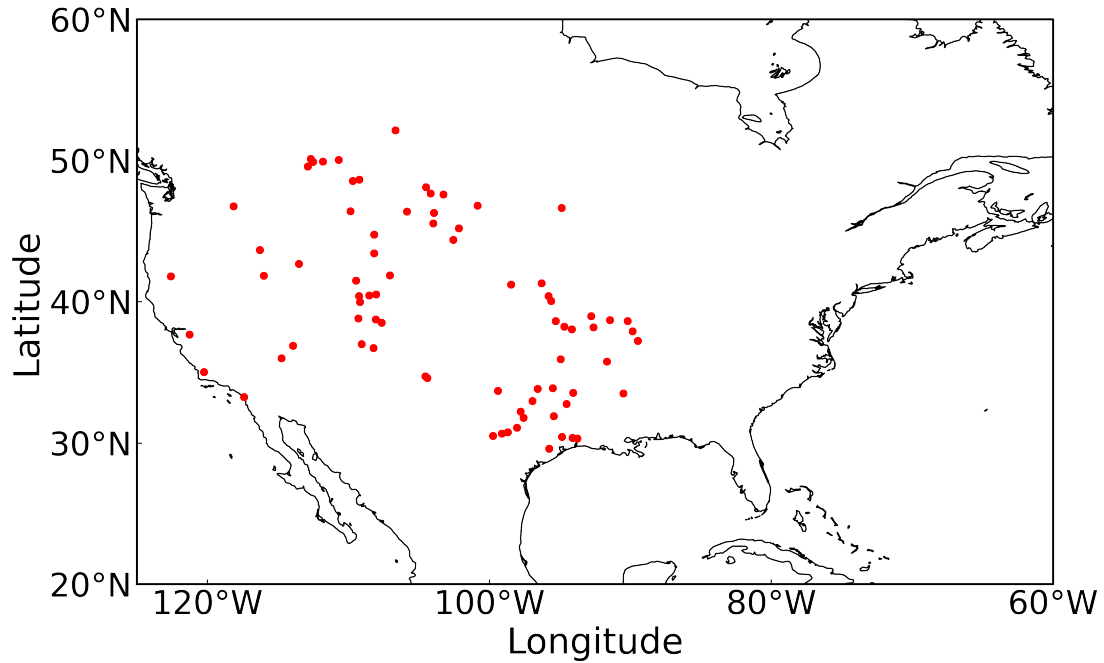

40

41 **Figure S7.** Locations of the catchment outlets for the 77 catchments affected by  
 42 irrigation.

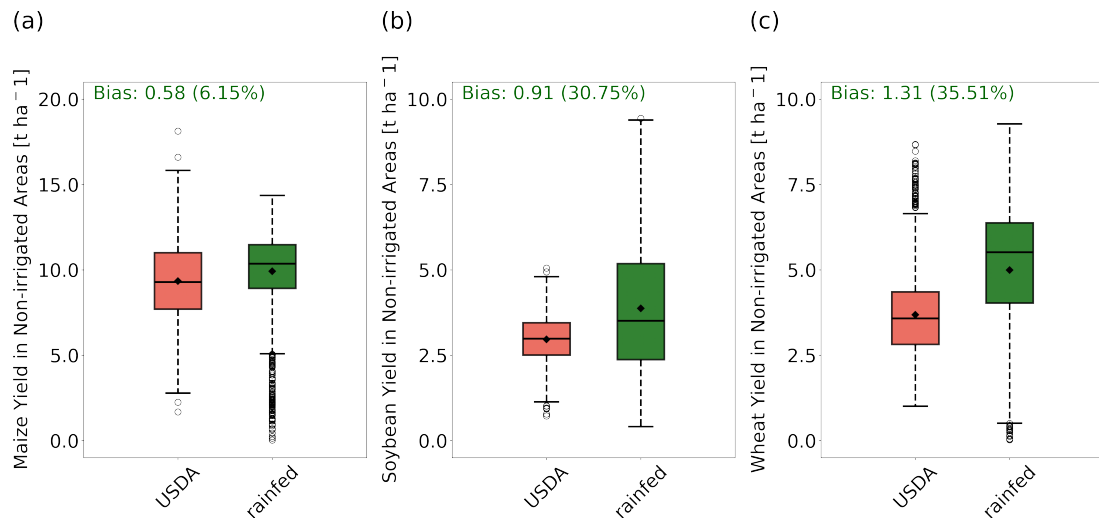

43

44 **Figure S8.** Evaluation of crop yield simulated in the United States. (a) Maize yield in  
 45 rainfed maize-growing regions of the United States, as reported by the USDA (orange  
 46 boxes), compared with simulations by CoLM in the non-irrigation region (green  
 47 boxes). Since reported yields are at the county scale, grid-based simulation results  
 48 were aggregated to corresponding counties. The boxes represent the interquartile  
 49 range, black lines indicate median values, black dots show mean values, and dashed  
 50 black whiskers extend to 1.5 times the interquartile range; points outside the boxes  
 51 represent outliers. (b-c) Same as (a) but for soybean and wheat yields.

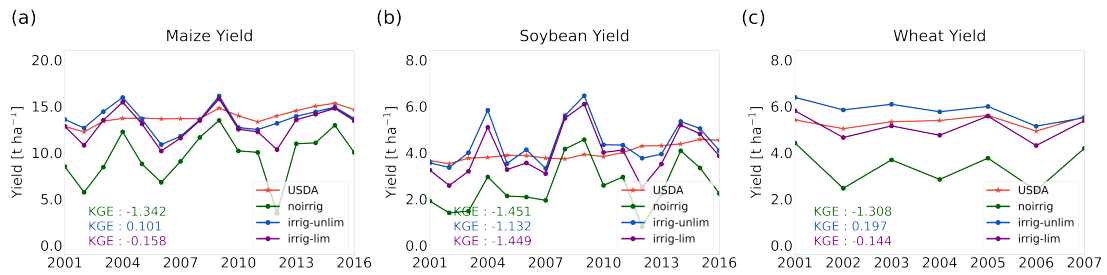

52  
 53 **Figure S9.** Comparison of observed and simulated annual yield variations for three  
 54 crops in the United States. (a) Annual maize yield in irrigated maize-growing regions  
 55 of the United States from 2001 to 2016, as reported by the USDA (orange lines),  
 56 compared with simulations by CoLM using the noirrig (green lines), irrig-unlim (blue  
 57 lines), and irrig-lim (purple lines) schemes. KGE values for the three simulation  
 58 schemes are indicated in the panel. (b-c) Same as (a), but for annual soybean and  
 59 wheat yields.

60

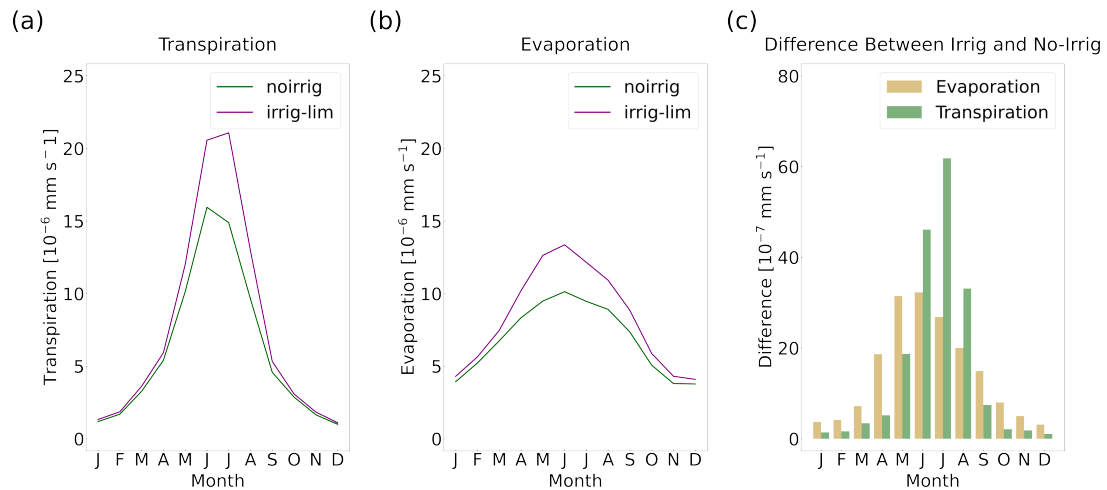

61  
 62 **Figure S10.** Differences in simulated evaporation and transpiration with and without  
 63 irrigation. (a-b) Monthly transpiration (a) and evaporation (b) averaged from 2001 to  
 64 2016, simulated by CoLM using the noirrig and irrig-lim schemes in irrigation regions  
 65 of the United States. (c) Monthly average differences in simulated transpiration and  
 66 evaporation between the noirrig and irrig-lim schemes.

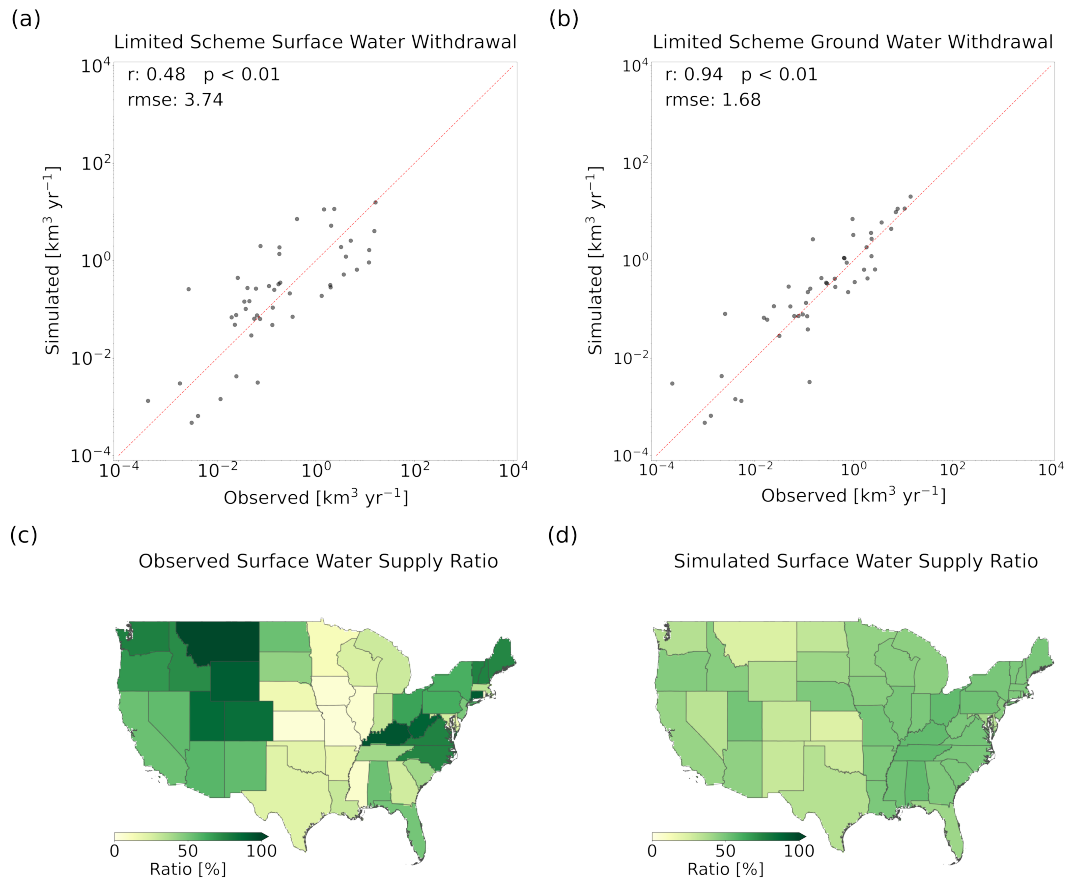

67  
 68 **Figure S11.** Comparison of reported and simulated irrigation water withdrawal in the  
 69 United States by water source using a sequential water withdrawal method. (a)  
 70 Proportion of surface water in irrigation withdrawal based on USGS reports for  
 71 individual states. (b) Proportion of surface water in irrigation withdrawal simulated by  
 72 CoLM for individual states using the sequential water withdrawal method. In this  
 73 approach, water demand is not pre-allocated between surface and groundwater  
 74 sources but is met sequentially, with surface water withdrawn first, followed by  
 75 groundwater.

76 **Table S1.** Total storage capacity and irrigation area of reservoirs of different scales<sup>1</sup>

| Engineering Grade | Reservoir Scale | Total Storage Capacity (billion m <sup>3</sup> ) | Irrigation Area (100,000 mu)* |
|-------------------|-----------------|--------------------------------------------------|-------------------------------|
| I                 | Large (Type 1)  | > 10                                             | > 150                         |
| II                | Large (Type 2)  | 10 - 1                                           | 150 - 50                      |
| III               | Medium          | 1 - 0.1                                          | 50 - 5                        |
| IV                | Small (Type 1)  | 0.1 - 0.01                                       | 5 - 0.5                       |
| V                 | Small (Type 2)  | 0.01 - 0.001                                     | < 0.5                         |

77 \* mu is a unit of area (1 mu ≈ 666.67 square meters).



78 **References:**

- 79 1. Ministry of Water Resources of China: Standard for rank classification and flood protection  
80 criteria of water and hydropower projects, SL 252–2017, <http://121.36.94.83:9008/jsp/yishen>  
81 [qing/appladd/biaozhunfile/detail.jsp?bzbh=SL%2B252-2017#](http://121.36.94.83:9008/jsp/yishen/qing/appladd/biaozhunfile/detail.jsp?bzbh=SL%2B252-2017#) (last access: October 2023), 201  
82 7
